# Supplementary material for: Genome-Wide Association Study of Topsoil Root System Architecture in Field-Grown Soybean [Glycine max (L.) Merr.]
Source: Front Plant Sci. 2021 Feb 10;11:590179. doi: 10.3389/fpls.2020.590179 (PMC7902768; doi:10.3389/fpls.2020.590179)
Supplement: Supplementary file 13 [file Table_5.XLSX]

## Sheet: Table S6
SNPs	Loci	SNP	Chromosome	Position	P.value	Minor Allele Frequency	Log10 P Values	Allele Effect	Std Error	t Value	F Value	Q Value	R2	Traits
1	1	ss715583303	2	46530067	0.000691219	0.411765	3.16038	0.371642	0.108304	3.43147	11.775	0.029152	0.0389952	LSLD
		ss715583303	2	46530067	0.00051491	0.411765	3.28827	0.320925	0.0913287	3.51395	12.3479	0.022784	0.0398892	ALD
		ss715583303	2	46530067	0.000588804	0.411765	3.23003	0.985869	0.283574	3.47658	12.0866	0.0197888	0.0363248	PC1
2	2	ss715589583	4	9104210	0.000101298	0.378893	3.9944	0.609571	0.154544	3.94432	15.5576	0.0366186	0.0487624	UPLN
		ss715589583	4	9104210	4.20832e-05	0.378893	4.37589	1.01497	0.243871	4.1619	17.3214	0.0366186	0.0561627	NPL
		ss715589583	4	9104210	4.27218e-05	0.378893	4.36935	1.18521	0.285027	4.15824	17.291	0.0366186	0.0519658	PC1
3	3	ss715588242	4	45895882	0.000391269	0.0709343	3.40752	0.933517	0.260068	3.58951	12.8846	0.0366186	0.0437346	USLD
		ss715588242	4	45895882	0.000617955	0.0709343	3.20904	0.756254	0.218379	3.46304	11.9926	0.0366186	0.0387416	ALD
4	4	ss715590397	5	1960856	0.00023337	0.33391	3.63196	-0.607416	0.162917	-3.72836	13.9007	0.036337	0.0435691	UPLN
		ss715590397	5	1960856	0.000502595	0.33391	3.29878	-0.897213	0.254842	-3.52067	12.3951	0.0366186	0.0401897	NPL
5	5	ss715602853	8	9332121	0.000793461	0.223183	3.10047	0.476852	0.14057	3.39228	11.5076	0.0366186	0.0381097	LSLD
		ss715602853	8	9332121	0.000589827	0.223183	3.22928	1.25662	0.361503	3.4761	12.0833	0.037287	0.0363146	PC1
6	6	ss715601637	8	39714639	0.000336192	0.0934256	3.47341	0.7002	0.192855	3.63071	13.1821	0.0374279	0.043655	LSLD
		ss715601637	8	39714639	0.000785521	0.0934256	3.10484	1.7301	0.509578	3.39515	11.5271	0.0173172	0.034643	PC1
7	7	ss715604322	9	42951837	0.000425536	0.237024	3.37106	-0.442939	0.124193	-3.56654	12.7202	0.0229794	0.0431768	USLD
		ss715604322	9	42951837	0.000155199	0.237024	3.80911	-0.418058	0.109008	-3.83513	14.7082	0.0219373	0.0475141	ALD
8		ss715604431	9	43681624	0.000448726	0.453287	3.34802	-0.375917	0.105834	-3.55197	12.6165	0.0238617	0.0428246	USLD
		ss715604431	9	43681624	0.000599562	0.453287	3.22217	-1.60092	0.461158	-3.47151	12.0514	0.0352308	0.0398309	LLAA
9	8	ss715613088	12	4364475	4.8365e-05	0.278547	4.31547	1.05714	0.256086	4.12804	17.0408	0.0300023	0.0552527	NPL
		ss715613088	12	4364475	0.000269515	0.278547	3.56942	1.09775	0.297486	3.69009	13.6168	0.0336423	0.0409234	PC1
10	9	ss715614264	13	26344379	0.000466228	0.33045	3.3314	0.53646	0.151481	3.54143	12.5417	0.0363177	0.0393096	UPLN
		ss715614264	13	26344379	0.000493701	0.33045	3.30654	0.84889	0.240778	3.52561	12.4299	0.0343105	0.0403026	NPL
		ss715614264	13	26344379	0.000541393	0.33045	3.26649	0.974944	0.278554	3.50002	12.2501	0.0363054	0.0368161	PC1
11	10	ss715618165	14	31869835	0.000601729	0.103806	3.2206	0.535028	0.154164	3.4705	12.0444	0.0345752	0.0389088	ALD
		ss715618165	14	31869835	0.000347254	0.103806	3.45935	1.7133	0.473032	3.62195	13.1185	0.033934	0.039426	PC1
12		ss715618168	14	31978272	0.00061046	0.145329	3.21434	-0.545737	0.157433	-3.46646	12.0164	0.0348328	0.0397946	LSLD
		ss715618168	14	31978272	0.000103766	0.145329	3.98395	-0.519247	0.131848	-3.93822	15.5096	0.0358769	0.0501029	ALD
		ss715618168	14	31978272	0.000221043	0.145329	3.65552	-1.51378	0.404461	-3.74271	14.0079	0.0343105	0.0420988	PC1
13		ss715618173	14	32148722	0.000155968	0.152249	3.80696	0.607821	0.158541	3.83385	14.6984	0.0338306	0.0486766	LSLD
		ss715618173	14	32148722	0.000124718	0.152249	3.90407	0.519535	0.133509	3.89139	15.1429	0.0344581	0.0489184	ALD
14	11	ss715618902	14	43548260	0.000593696	0.290657	3.22644	-0.617247	0.177662	-3.47427	12.0705	0.0342156	0.0378328	UPLN
		ss715618902	14	43548260	0.000769491	0.290657	3.1138	-0.949745	0.279252	-3.40103	11.567	0.0363177	0.0375046	NPL
15		ss715618903	14	43557868	0.000593696	0.290657	3.22644	0.617247	0.177662	3.47427	12.0705	0.0363177	0.0378328	UPLN
		ss715618903	14	43557868	0.000769492	0.290657	3.1138	0.949745	0.279252	3.40103	11.567	0.0363177	0.0375046	NPL
16		ss715618905	14	43561539	0.00044242	0.292388	3.35417	0.629853	0.177131	3.55586	12.6441	0.0360566	0.0396306	UPLN
		ss715618905	14	43561539	0.000474419	0.292388	3.32384	0.984331	0.278325	3.53662	12.5077	0.0338042	0.0405548	NPL
17		ss715618908	14	43572822	0.000357176	0.294118	3.44712	0.642602	0.177794	3.61431	13.0633	0.0347959	0.0409443	UPLN
		ss715618908	14	43572822	0.000446369	0.294118	3.35031	0.991792	0.27911	3.55342	12.6268	0.035334	0.0409409	NPL
18		ss715618911	14	43575830	0.000557451	0.288927	3.25379	0.622186	0.178181	3.49187	12.1932	0.0342156	0.0382171	UPLN
		ss715618911	14	43575830	0.000697622	0.288927	3.15638	0.960199	0.280034	3.42886	11.7571	0.0341609	0.038121	NPL
19		ss715618915	14	43597753	0.00044242	0.292388	3.35417	0.629853	0.177131	3.55586	12.6441	0.0111094	0.0396306	UPLN
		ss715618915	14	43597753	0.000474419	0.292388	3.32384	0.984331	0.278325	3.53662	12.5077	0.0104002	0.0405548	NPL
20		ss715618917	14	43604766	0.00044242	0.292388	3.35417	0.629853	0.177131	3.55586	12.6441	0.0126836	0.0396306	UPLN
		ss715618917	14	43604766	0.000474419	0.292388	3.32384	0.984331	0.278325	3.53662	12.5077	0.03	0.0405548	NPL
21		ss715618918	14	43606363	0.000552965	0.287197	3.2573	-0.626225	0.179222	-3.49412	12.2089	0.04	0.0382665	UPLN
		ss715618918	14	43606363	0.00056461	0.287197	3.24825	-0.981282	0.281306	-3.48831	12.1683	0.04	0.0394544	NPL
22		ss715621832	15	40976845	0.000164411	0.439446	3.78407	0.620822	0.162511	3.82018	14.5938	0.02	0.0457414	UPLN
		ss715621832	15	40976845	0.000506172	0.439446	3.2957	0.387101	0.110013	3.5187	12.3813	0.02	0.0420262	USLD
		ss715621832	15	40976845	0.000323483	0.439446	3.49015	0.342273	0.0940021	3.64112	13.2577	0.04	0.0428285	ALD
		ss715621832	15	40976845	1.80374e-05	0.439446	4.74383	1.29803	0.297472	4.36353	19.0404	0.04	0.0572235	PC1
23	12	ss715624967	16	37323949	4.97046e-05	0.453287	4.3036	-0.449886	0.109159	-4.12137	16.9857	0.04	0.0562516	LSLD
		ss715624967	16	37323949	0.000248515	0.453287	3.60465	-0.340407	0.0917121	-3.71169	13.7766	0.04	0.0445048	ALD
24		ss715624973	16	37381270	9.52644e-05	0.467128	4.02107	-0.439048	0.110875	-3.95983	15.6803	0.04	0.0519284	LSLD
		ss715624973	16	37381270	0.000526835	0.467128	3.27833	-0.326713	0.0931445	-3.5076	12.3032	0.04	0.039745	ALD
25	13	ss715632710	18	7954314	2.92224e-06	0.238754	5.53428	0.669351	0.140214	4.77377	22.7889	0.04	0.0773532	USLD
		ss715632710	18	7954314	9.24736e-05	0.238754	4.03398	0.482208	0.121545	3.96733	15.7397	0.04	0.0508464	ALD
26		ss715632713	18	7963930	1.29262e-05	0.238754	4.88853	-0.623386	0.140376	-4.44084	19.7211	0.04	0.0669402	USLD
		ss715632713	18	7963930	0.000272497	0.238754	3.56464	-0.448555	0.121654	-3.68715	13.5951	0.03	0.0439183	ALD
27	14	ss715632806	18	8660316	1.49582e-05	0.247405	4.82512	-0.605474	0.137386	-4.4071	19.4225	0.04	0.0659266	USLD
		ss715632806	18	8660316	0.000438325	0.247405	3.3582	-0.422365	0.118695	-3.55842	12.6623	0.04	0.040905	ALD
28	15	ss715634102	19	34015909	0.000201537	0.432526	3.69564	-0.578515	0.153573	-3.76702	14.1905	0.04	0.0444773	UPLN
		ss715634102	19	34015909	0.000156197	0.432526	3.80633	-1.14034	0.297471	-3.83347	14.6955	0.04	0.0441653	PC1
29		ss715634106	19	34038285	0.000540856	0.434256	3.26692	0.54292	0.155107	3.50029	12.252	0.04	0.0384017	UPLN
		ss715634106	19	34038285	0.00038461	0.434256	3.41498	1.07816	0.299972	3.59419	12.9182	0.04	0.0388239	PC1
30	16	ss715634639	19	37841812	0.000447237	0.435986	3.34946	-0.558352	0.157155	-3.55288	12.623	0.04	0.0422678	LPLN
		ss715634639	19	37841812	0.00075686	0.435986	3.12098	-0.671953	0.1973	-3.40574	11.5991	0.04	0.0393828	PC2
31	17	ss715636802	20	11434953	0.000449308	0.16263	3.34746	-1.49789	0.421751	-3.55161	12.6139	0.04	0.0408993	NPL
		ss715636802	20	11434953	0.00057473	0.16263	3.24054	-1.75377	0.503473	-3.48335	12.1337	0.04	0.0364663	PC1
