# Supplementary material for: Genome-Wide Association Study of Topsoil Root System Architecture in Field-Grown Soybean [Glycine max (L.) Merr.]
Source: Front Plant Sci. 2021 Feb 10;11:590179. doi: 10.3389/fpls.2020.590179 (PMC7902768; doi:10.3389/fpls.2020.590179)
Supplement: Supplementary file 14 [file Table_6.XLSX]

## Sheet: Sheet1
Gene ID	Chr	Distance from SNP in Mb	Functional Annotation	Start	Stop
Glyma.04g036700	Gm04	0.5	Myb-like DNA-binding domain	2900153	2900785
Glyma.09g147100	Gm09	0.5	Myb-like DNA-binding domain	36499472	36502629
Glyma.15g221800	Gm15	0.49	Leucine-rich repeat receptor-like protein kinase	40112860	40116663
Glyma.08g127000	Gm08	0.48	Serine/threonine protein kinase	9781692	9785219
Glyma.02g308700	Gm02	0.45	FASCICLIN-like arabinogalactan 2	48245199	48247085
Glyma.10g142200	Gm10	0.45	Myb-like DNA-binding domain	37648395	37652816
Glyma.18g221300	Gm18	0.45	EF-hand calcium-binding domain containing protein	50849524	50851190
Glyma.18g085500	Gm18	0.44	Glycerophosphoryl diester phosphodiesterase	8439498	8446212
Glyma.18g085400	Gm18	0.43	Glycerophosphoryl diester phosphodiesterase	8419485	8432575
Glyma.05g110400	Gm05	0.43	Leucine-rich repeat receptor-like protein kinase	29264890	29268953
Glyma.07g080300	Gm07	0.4	Serine/threonine protein kinase	7300143	7301150
Glyma.02g035300	Gm02	0.399454	Root hair specific 10 (RHS10)	3271443	3277257
Glyma.02g307600	Gm02	0.38	Rho GDP-dissociation inhibitor activity	48182234	48184522
Glyma.18g076600	Gm18	0.38	FASCICLIN-like arabinogalactan 1	7283307	7285852
Glyma.14g217700	Gm14	0.35	AUX/IAA family	48242771	48249860
Glyma.05g203900	Gm05	0.35	WRKY DNA-binding protein 75	38751047	38751631
Glyma.06g068600	Gm06	0.34	Phospholipase D1	5257871	5262176
Glyma.06g068700	Gm06	0.33	Phospholipase D1	5264111	5268817
Glyma.08g116600	Gm08	0.33	Leucine-rich repeat receptor-like protein kinase	8968563	8975029
Glyma.18g180400	Gm18	0.33	Protein phosphatase 2C/pyruvate dehydrogenase (lipoamide) phosphatase	43424554	43427474
Glyma.07g034200	Gm07	0.31	AUX/IAA family (indole-3-acetic acid inducible 19)	2691220	2695027
Glyma.17g156300	Gm17	0.31	Leucine-rich repeat receptor-like protein kinase	13312734	13316817
Glyma.10g153900	Gm10	0.3	Lipoxygenase 1(oxidation-reduction process)	38898358	38904608
Glyma.12g056300	Gm12	0.3	AP2 domain (sequence-specific DNA binding transcription factor activity)	4099867	4103287
Glyma.05g019100	Gm05	0.3	COBRA-like extracellular glycosyl-phosphatidyl inositol-anchored protein family	1699459	1702443
Glyma.01g224100	Gm01	0.29	AP2 domain (cytokinin response factor 4)	55285613	55286944
Glyma.08g252600	Gm08	0.29	Auxin transport protein (BIG)	22181948	22201676
Glyma.01g241300	Gm01	0.29	Serine/Threonine-Protein Kinase ATM-related	56488899	56535775
Glyma.05g238400	Gm05	0.26	EF hand calcium-binding protein family	41442332	41442898
Glyma.06g075700	Gm06	0.26	FASCICLIN-like arabinogalactan protein 8	5860455	5861442
Glyma.09g203300	Gm09	0.26	AUX/IAA family (indoleacetic acid-induced protein 8)	42740672	42745026
Glyma.10g180000	Gm10	0.26	AUX/IAA transcriptional regulator family protein	41336339	41337449
Glyma.13g063700	Gm13	0.25	Multidrug/pheromone exporter, ABC superfamily	16244639	16254831
Glyma.12g063100	Gm12	0.24	Protein phosphatase 2C	4635149	4638637
Glyma.16g018700	Gm16	0.24	WD domain, G-beta repeat	1658687	1660150
Glyma.10g180100	Gm10	0.23	AUX/IAA transcriptional regulator family protein	41371565	41374446
Glyma.09g215700	Gm09	0.23	Leucine-rich repeat receptor-like protein kinase	43923155	43932267
Glyma.07g034800	Gm07	0.23	Lipoxygenase 1(oxidation-reduction process)	2763836	2770113
Glyma.04g045300	Gm04	0.22	Root hair defective 6-like 2	3616726	3618560
Glyma.06g288600	Gm06	0.22	Leucine-rich repeat receptor-like protein kinase	47720790	47724756
Glyma.08g248900	Gm08	0.22	Leucine-rich repeat receptor-like protein kinase	21678304	21680829
Glyma.05g197700	Gm05	0.21	Serine/threonine protein kinase	38187821	38191923
Glyma.07g034900	Gm07	0.21	Lipoxygenase 1(oxidation-reduction process)	2782231	2787974
Glyma.08g287900	Gm08	0.2	Leucine-rich repeat receptor-like protein kinase	39898566	39901324
Glyma.05g239500	Gm05	0.18	Myb-like DNA-binding domain	41517981	41520403
Glyma.16g213000	Gm16	0.18	Root hair initiation protein root hairless 1 (RHL1)	37118629	37125494
Glyma.08g249200	Gm08	0.17	Leucine-rich repeat receptor-like protein kinase	21727446	21730345
Glyma.08g287500	Gm08	0.16	BURP domain (Polygalacturonase 2)	39862688	39865201
Glyma.12g076200	Gm12	0.15	AUX/IAA family (regulation of transcription, DNA-templated)	5851956	5855787
Glyma.17g233900	Gm17	0.15	WD40 repeat protein	38942847	38949513
Glyma.02g281100	Gm02	0.15	Leucine-rich repeat receptor-like protein kinase	46350420	46355136
Glyma.08g249400	Gm08	0.15	Leucine-rich repeat receptor-like protein kinase	21748017	21750483
Glyma.08g329900	Gm08	0.14	FASCICLIN-like arabinogalactan 1	44760698	44763165
Glyma.09g010300	Gm09	0.11	Rho GDP-dissociation inhibitor	792628	795261
Glyma.01g219300	Gm01	0.1	Root hair specific 8 (RHS8)	54895767	54897277
Glyma.08g287400	Gm08	0.1	BURP domain (Polygalacturonase 2)	39797413	39798965
Glyma.09g067600	Gm09	0.1	EF hand calcium-binding protein family	6804057	6804365
Glyma.10g159000	Gm10	0.1	WD40 repeat-containing protein	39295428	39305050
Glyma.08g249700	Gm08	0.1	COBRA-like extracellular glycosyl-phosphatidyl inositol-anchored protein family	21802765	21806491
Glyma.03g018800	Gm03	0.08	Serine/threonine protein kinase	1875182	1876855
Glyma.14g115200	Gm14	0.08	UDP-glucose/GDP-mannose dehydrogenase family, UDP binding domain	13679354	13680451
Glyma.03g017300	Gm03	0.06	AP2 domain ( related to AP2 11 )	1744329	1745354
Glyma.06g072200	Gm06	0.06	WD40 repeat-containing protein	5533994	5547204
Glyma.09g212800	Gm09	0.04	Transcription factor regulating root and shoot growth via Pin3	43657847	43664803
Glyma.12g077300	Gm12	0.04	Leucine-rich repeat receptor-like protein kinase	5957770	5964375
Glyma.06g286400	Gm06	0.02	Ubiquitin-specific protease 15	47479202	47486309
Glyma.05g022600	Gm05	0.02	UDP-glucose/GDP-mannose dehydrogenase	1980136	1985661
Glyma.02g229400	Gm02	0.01	Tetratricopeptide repeat (TPR)-containing protein	41688132	41693178
Glyma.10g137600	Gm10	0.01	Multidrug/pheromone exporter, ABC superfamily	37137523	37143916
Glyma.10g138500	Gm10	0.01	AUX/IAA family (indole-3-acetic acid inducible 30)	37212160	37213763
