# Supplementary material for: Genome-Wide Association Study of Topsoil Root System Architecture in Field-Grown Soybean [Glycine max (L.) Merr.]
Source: Front Plant Sci. 2021 Feb 10;11:590179. doi: 10.3389/fpls.2020.590179 (PMC7902768; doi:10.3389/fpls.2020.590179)
Supplement: Supplementary file 15 [file Table_7.XLSX]

## Sheet: Sheet1
Loci	Gene ID	Chr	Functional Annotation	Start	Stop	Distance from SNP in Mb
1	Glyma.02g281100	Gm02	Leucine-rich repeat receptor-like protein kinase	46350420	46355136	0.15
3	Glyma.04g186700	Gm04	Subgroup I aminotransferase related	45681308	45690777	0.21
4	Glyma.05g019100	Gm05	COBRA-like extracellular glycosyl-phosphatidyl inositol-anchored protein family	1699459	1702443	0.3
	Glyma.05g022600	Gm05	UDP-glucose/GDP-mannose dehydrogenase	1980136	1985661	0.02
5	Glyma.08g116600	Gm08	Leucine-rich repeat receptor-like protein kinase	8968563	8975029	0.33
	Glyma.08g127000	Gm08	Serine/threonine protein kinase	9781692	9785219	0.48
6	Glyma.08g287400	Gm08	BURP domain (Polygalacturonase 2)	39797413	39798965	0.1
	Glyma.08g287500	Gm08	BURP domain (Polygalacturonase 2)	39862688	39865201	0.16
	Glyma.08g287900	Gm08	Leucine-rich repeat receptor-like protein kinase	39898566	39901324	0.2
7	Glyma.09g203300	Gm09	AUX/IAA family (indoleacetic acid-induced protein 8)	42740672	42745026	0.26
	Glyma.09g212800	Gm09	Transcription factor regulating root and shoot growth via Pin3	43657847	43664803	0.04
	Glyma.09g215700	Gm09	Leucine-rich repeat receptor-like protein kinase	43923155	43932267	0.23
8	Glyma.12g056300	Gm12	AP2 domain (sequence-specific DNA binding transcription factor activity)	4099867	4103287	0.3
	Glyma.12g063100	Gm12	Protein phosphatase 2C	4635149	4638637	0.24
9	Glyma.13g151100	Gm13	Serine-threonine protein kinase	26525954	26535657	0.19
10	Glyma.15g221800	Gm15	Leucine-rich repeat receptor-like protein kinase	40112860	40116663	0.49
12	Glyma.16g213000	Gm16	Root hair initiation protein root hairless 1 (RHL1)	37118629	37125494	0.18
14	Glyma.18g085400	Gm18	Glycerophosphoryl diester phosphodiesterase	8419485	8432575	0.43
	Glyma.18g085500	Gm18	Glycerophosphoryl diester phosphodiesterase	8439498	8446212	0.44
15	Glyma.19g094100	Gm19	WRKY DNA -binding domain	33279312	33281763	0.02
